# Supplementary material for: Experiences of using artificial intelligence in healthcare: a qualitative study of UK clinician and key stakeholder perspectives
Source: HighWire-hosted journal article supplement (doi:10.1136/bmjopen-2023-076950), 2023-12-01
Supplement: bmjopen-2023-076950supp001_data_supplement.pdf [file bmjopen-2023-076950supp001_data_supplement.pdf]

## Supplementary Material 1

### Indicative guide for interviews

#### Introduction

- a. What is your previous experience of AI research in healthcare?
  - i. Are there any particular barriers you've faced? Any facilitators?
  - ii. Do you know of any specific AI tools used to guide decision making in cardiology or healthcare more broadly?
  - iii. What impact do you think AI tools might have on patient's access to care?
    1. What factors currently impact patient's access to care? How might AI tools help affect these?
  - iv. If AI tools were widely accepted in the NHS, what impact could this have on the staff workload?
    1. Is there anything that AI developers could do to ensure the tool fits into the NHS workflow?
    2. Is there anything the NHS could do?
  - v. Has your perception of using AI tools changed over time?
  - vi. Are there any factors that would help clinicians feel more comfortable when using AI tools?
    1. Are there any changes that would need to be made at NHS Trust/organisation level to facilitate the use of AI tools?
  - vii. Are there any factors that would help patients feel more comfortable with AI tools being used in their care?
  - viii. Is there anything we could do to encourage NHS sites to participate in AI research like PROTEUS?
  - ix. What impact could using AI tools have on patient care and clinical decision making?
    1. What are some of the benefits of using AI tools? What are some of the potential risks?
  - x. Do you have any thoughts or questions to add?
